# Supplementary material for: Polybrominated Diphenyl Ether Exposure and Thyroid Function Tests in North American Adults
Source: PubMed Central journal article supplement (PMC4829976; doi:10.1289/ehp.1509755), 2015-09-15
Supplement: ehp.1509755.s001.acco.pdf [file ehp.1509755.s001.acco.pdf]

**Note to Readers:** *EHP* strives to ensure that all journal content is accessible to all readers. However, some figures and Supplemental Material published in *EHP* articles may not conform to 508 standards due to the complexity of the information being presented. If you need assistance accessing journal content, please contact [ehp508@niehs.nih.gov](mailto:ehp508@niehs.nih.gov). Our staff will work with you to assess and meet your accessibility needs within 3 working days.

## **Supplemental Material**

### **Polybrominated Diphenyl Ether Exposure and Thyroid Function Tests in North American Adults**

Colleen M. Makey, Michael D. McClean, Lewis E. Braverman, Elizabeth N. Pearce, Xue-Mei He, Andreas Sjödin, Janice M. Weinberg, and Thomas F. Webster

#### **Table of Contents**

**Table S1.** Spearman correlation coefficients between PBDE congeners at initial sampling round (47 serum samples).

**Table S2.** Results from general linear regression models evaluating the association between lipid-standardized PBDEs and thyroid function tests. (51 adults, 137 serum samples).

**Table S3.** Estimated ICCs and variance components for repeated serum markers of thyroid function tests.

**Figure S1.** Distribution of thyroid function tests: untransformed and natural log transformed: (A) Total T<sub>4</sub>, (B) TSH, (C) Free T<sub>4</sub>, (D) Total T<sub>3</sub>.

**Figure S2A-B.** Unadjusted cross-sectional associations between BDE-47 and Total T<sub>4</sub> in Round 1: A) without outlier (N=46) B) with outlier (N=47)\*.

**Table S1.** Spearman correlation coefficients between PBDE congeners at initial sampling round (47 serum samples).

|         | BDE-28 | BDE-47                 | BDE-99                 | BDE-100                | BDE-153                |
|---------|--------|------------------------|------------------------|------------------------|------------------------|
| BDE-28  | 1.0    | $r=0.92$<br>$p<0.0001$ | $r=0.88$<br>$p<0.0001$ | $r=0.85$<br>$p<0.0001$ | $r=0.29$<br>$p=0.045$  |
| BDE-47  |        | 1.0                    | $r=0.97$<br>$p<0.0001$ | $r=0.96$<br>$p<0.0001$ | $r=0.42$<br>$p=0.0033$ |
| BDE-99  |        |                        | 1.0                    | $r=0.95$<br>$p<0.0001$ | $r=0.40$<br>$p=0.0054$ |
| BDE-100 |        |                        |                        | 1.0                    | $r=0.47$<br>$p=0.0008$ |
| BDE-153 |        |                        |                        |                        | 1.0                    |

Abbreviations:  $p$  (p-value),  $r$  (spearman correlation coefficient)

**Table S2.** Results from general linear regression models evaluating the association between lipid-standardized PBDEs and thyroid function tests. (51 adults, 137 serum samples).

| <b>TFTs</b>                                 | <b>BDE-28</b><br><b><math>\beta</math> (95% CI)</b> | <b><i>p</i></b> | <b>BDE-47</b><br><b><math>\beta</math> (95% CI)</b> | <b><i>p</i></b> | <b>BDE-99</b><br><b><math>\beta</math> (95% CI)</b> | <b><i>p</i></b> | <b>BDE-100</b><br><b><math>\beta</math> (95% CI)</b> | <b><i>p</i></b> | <b>BDE-153</b><br><b><math>\beta</math> (95% CI)</b> | <b><i>p</i></b> |
|---------------------------------------------|-----------------------------------------------------|-----------------|-----------------------------------------------------|-----------------|-----------------------------------------------------|-----------------|------------------------------------------------------|-----------------|------------------------------------------------------|-----------------|
| <b>TT<sub>4</sub> (μg/dL)</b>               | -15 (-54, 23)                                       | 0.43            | -13 (-27, 0.57)                                     | 0.06            | -34 (-81, 13)                                       | 0.16            | -48 (-90, -6.7)                                      | 0.02            | -12 (-31, 6.8)                                       | 0.21            |
| <b>TSH ln(μIU/mL)<sup>a</sup></b>           | 47 (230, 130)                                       | 0.62            | 0.81 (-6.0, 7.6)                                    | 0.81            | 6.1 (-18, 30)                                       | 0.61            | 7.5 (-12, 14)                                        | 0.46            | 5.6 (-3.1, 14)                                       | 0.20            |
| <b>fT<sub>4</sub> ln(ng/dL)<sup>a</sup></b> | 2.9 (-46, 51)                                       | 0.91            | -0.57 (-2.3, 1.2)                                   | 0.53            | -3.7 (-9.8, 2.5)                                    | 0.24            | 2.5 (-2.6, 7.5)                                      | 0.33            | 3.0 (0.87, 5.0)                                      | 0.01            |
| <b>TT<sub>3</sub> ln(ng/mL)<sup>a</sup></b> | 6.1 (-44, 56)                                       | 0.81            | 0.15 (-1.7, 1.9)                                    | 0.87            | 1.4 (-5.3, 8.0)                                     | 0.68            | -1.3 (-6.4, 3.8)                                     | 0.62            | -1.5 (-3.7, 0.70)                                    | 0.18            |

Abbreviations:  $\beta$  (beta-estimate), CI (confidence interval), fT<sub>4</sub> (free thyroxine), *p* (p-value), TFTs (thyroid function tests), TT<sub>3</sub> (total triiodothyronine), TT<sub>4</sub> (total thyroxine), TSH (thyroid stimulating hormone)

<sup>a</sup> Dependent variable was natural log-transformed for regression analysis.

**Table S3.** Estimated ICCs and variance components for repeated serum markers of thyroid function tests.

| <b>Metrics</b>                          | <b>TSH (<math>\mu\text{IU/mL}</math>)</b> | <b>TT<sub>4</sub></b>    | <b>fT<sub>4</sub></b>    | <b>TT<sub>3</sub></b>    | <b>UIC</b>               |
|-----------------------------------------|-------------------------------------------|--------------------------|--------------------------|--------------------------|--------------------------|
|                                         | <b>Estimate (95% CI)</b>                  | <b>Estimate (95% CI)</b> | <b>Estimate (95% CI)</b> | <b>Estimate (95% CI)</b> | <b>Estimate (95% CI)</b> |
| <b>ICC</b>                              | 0.72 (0.56, 0.78)                         | 0.80 (0.68, 0.85)        | 0.69 (0.53, 0.77)        | 0.56 (0.39, 0.67)        | 0.38 (0.19, 0.50)        |
| <b><math>\sigma^2_{\text{W}}</math></b> | 0.11 (0.09, 0.2)                          | 0.36 (0.3, 0.5)          | 0.0075 (0.006, 0.01)     | 0.012 (0.009, 0.02)      | 0.38 (0.29, 0.53)        |
| <b><math>\sigma^2_{\text{B}}</math></b> | 0.28 (0.2, 0.4)                           | 1.4 (0.8, 2.0)           | 0.017 (0.009, 0.03)      | 0.015 (0.007, 0.03)      | 0.23 (0.077, 0.38)       |

Abbreviations: ICC (intraclass correlation coefficient), TSH (thyroid stimulating hormone), TT<sub>4</sub> (total thyroxine), fT<sub>4</sub> (free thyroxine), TT<sub>3</sub> (total triiodothyronine), UIC (urinary iodide concentration),  $\sigma^2_{\text{W}}$  (within subject variability),  $\sigma^2_{\text{B}}$  (between subject variability)

**Figure S1.** Distribution of thyroid function tests: untransformed and natural log transformed: (A) Total T<sub>4</sub>, (B) TSH, (C) Free T<sub>4</sub>, (D) Total T<sub>3</sub>.

A.

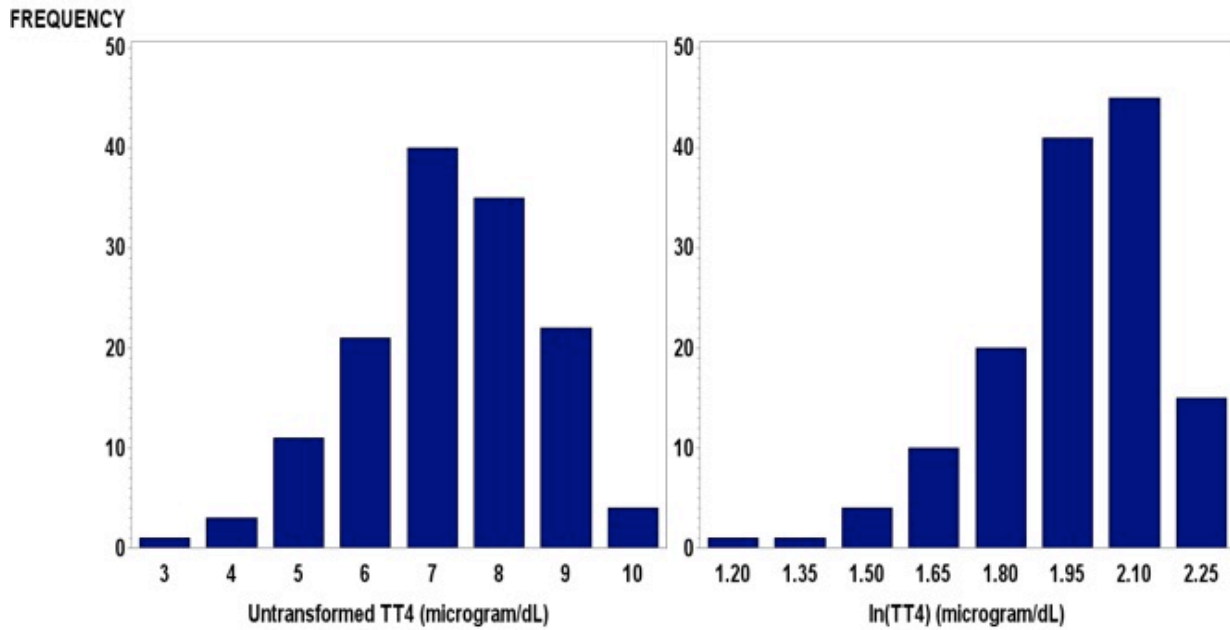

B.

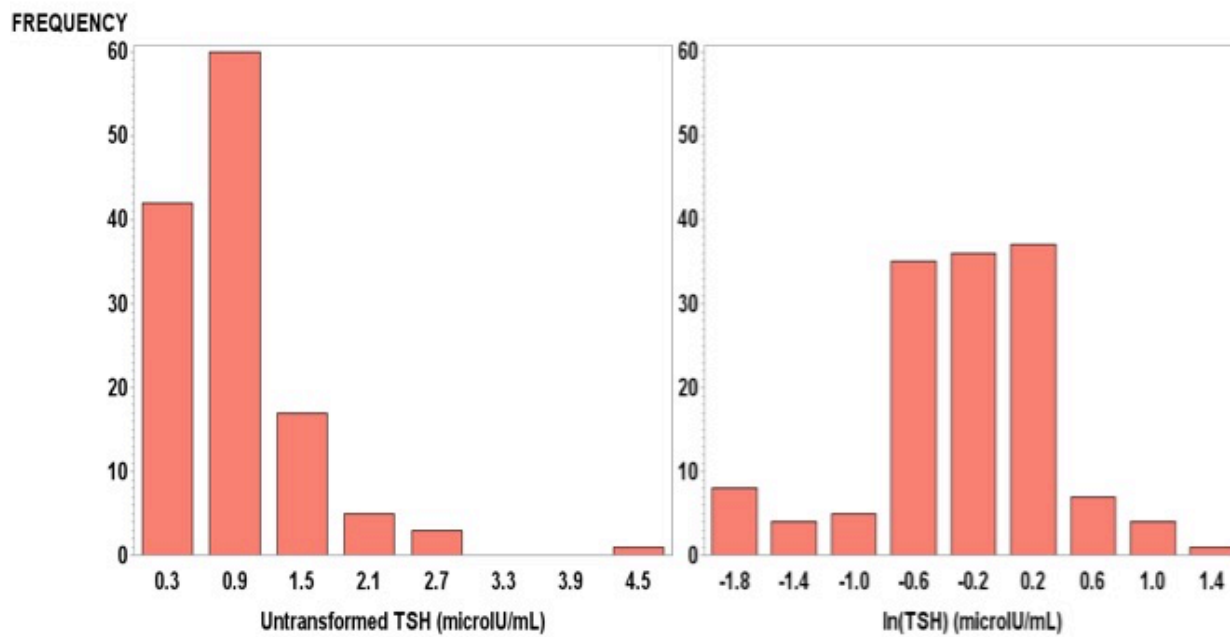

C.

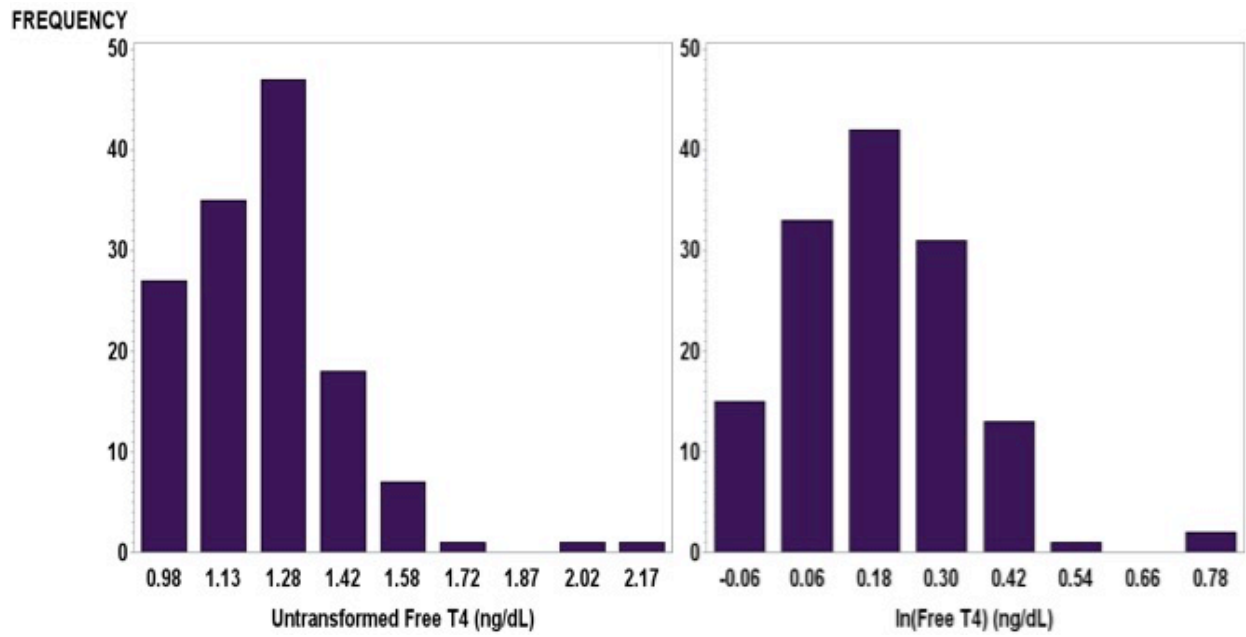

D.

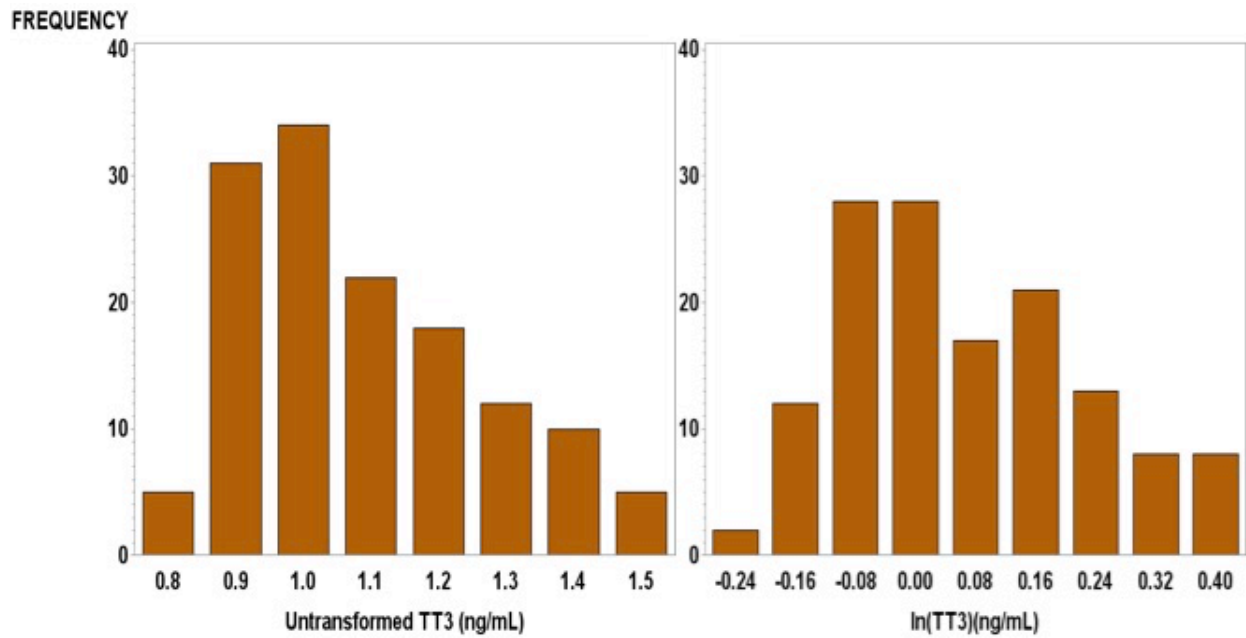

**Figure S2A-B.** Unadjusted cross-sectional associations between BDE-47 and Total T<sub>4</sub> in Round 1: A) without outlier (N=46) B) with outlier (N=47)\*.

A)

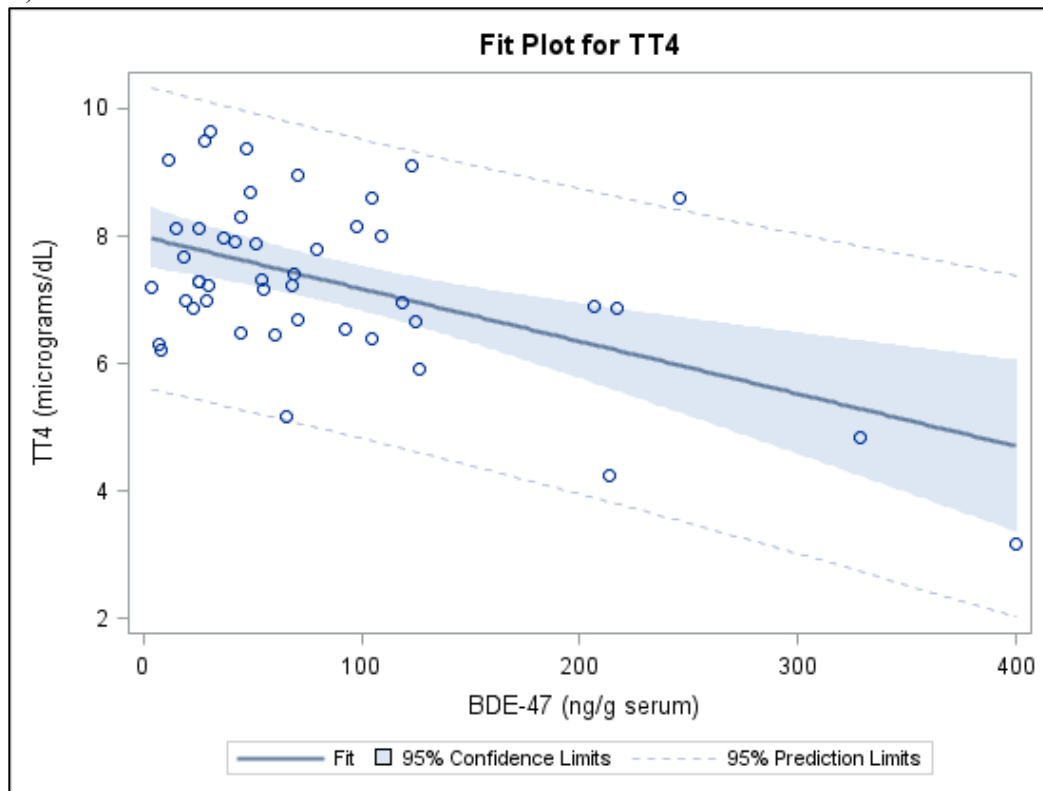

B.

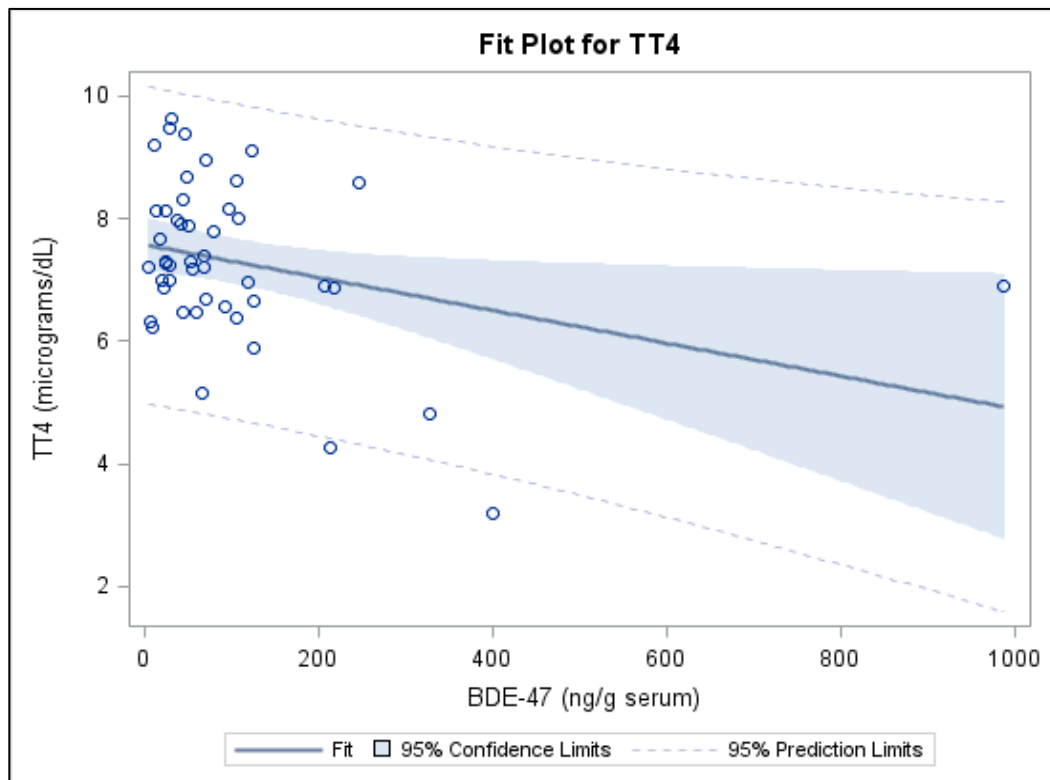

A) Relationship between BDE-47 and Total T<sub>4</sub> in Round 1 without outlying participant (N=46) ( $\beta=-8.2$ , 95% CI: -12.3, -4.1). B) Relationship between BDE-47 and Total T<sub>4</sub> in Round 1 with outlying participant (N=47) ( $\beta=-2.7$ , 95% CI: -5.1, -0.27). \* Outlying participant was a 64 year old, non-Hispanic white male.
